# Supplementary material for: Preparation and properties of polypyrrole-modified carbon black supported Pt3Cu alloy catalyst
Source: Royal Society of Chemistry journal article supplement (doi:10.1039/d3nj02261g), 2023-01-01
Supplement: d3nj02261g1.pdf [file d3nj02261g1.pdf]

## Supporting information

### **Preparation and properties of polypyrrole-modified carbon black supported Pt<sub>3</sub>Cu alloy catalyst**

*Jinghua Yu<sup>1</sup>, Yueling Guo<sup>1</sup>, Yajie Dai<sup>1</sup>, Ziren Jin<sup>2</sup>, Zhiqian Wang<sup>1</sup>, Fanghui  
Wang<sup>1</sup>, Hong Zhu<sup>1\*</sup>*

- a. State Key Laboratory of Chemical Resource Engineering, Institute of Modern Catalysis, Department of Organic Chemistry, College of Chemistry, Beijing University of Chemical Technology, Beijing 100029, P. R. China Tel: +86-10-64444919;
- b. The high school affiliated to Beijing normal university, Beijing 100050, P. R. China

\*Corresponding authors: <sup>a</sup>Hong Zhu ([zhuho128@126.com](mailto:zhuho128@126.com));

## Characterization

Transmission electron microscope (TEM) and JEOL JEM ARM200F scanning electron microscope (SEM) were used to observe the morphology and surface microstructure of the modified carbon carrier. The surface element composition and electronic properties of the catalyst were characterized by Al K $\alpha$  radiation source in XPS, LAB250 ESCA System, Thermo Fisher, USA. Using (ASP-2460-4N) N<sub>2</sub> adsorption-desorption isotherms to test the pore size distribution and specific surface area on carrier and catalyst. The structural defects of the modified carbon carrier were characterized by Renishausmann microscope with laser at 633 nm.

## Electrochemical measurements

Electrochemistry workstation in ZAHNER ENNIUM was used for electrochemical tests using a three-electrode system with Pt filament used as reverse electrode and Ag/AgCl used as reference electrode. 50% Nafion solution (mixed solution of isopropanol and deionized water) is prepared for catalyst dispersion, and the dispersed mixed liquid drops are added to the rotating disk electrode (RDE, 0.196 cm<sup>2</sup>) as the working electrode, with a load of 17  $\mu\text{g cm}^{-2}$ . Test in 0.1 M N<sub>2</sub> saturated HClO<sub>4</sub> with a scanning rate of 50 mV s<sup>-1</sup> and a cyclic potential of 0.05–1.1 V by cyclic voltammetry (CV). Linear sweep voltammetry (LSV) was set at a scan rate of 10 mV s<sup>-1</sup> and a speed of 1600 rpm in 0.1 M HClO<sub>4</sub> at saturation O<sub>2</sub>. Electrochemical Active Surface Area (ECSA) depends on the charge of the integral hydrogen desorption peak of 0.06–0.4 V in the CV curve. The durability test was conducted in 0.1 M HClO<sub>4</sub> solution saturated with O<sub>2</sub> at a scanning rate of 100 mV s<sup>-1</sup> for 10000 cycles.

Using Koutecky-Levich equation:

$$\frac{1}{j} = \frac{1}{i_k} + \frac{1}{i_d}$$

The catalyst with dynamic flow density ( $i_k$ ) of 0.9 V (relative to RHE) was obtained.  $j$  represents the measured current density at 0.9 V (relative to RHE), where  $i_d$  is the diffusion limiting current density at 0.4 V (relative to RHE). From this, we can obtain the mass activity (MA) and specific activity (SA) of the catalyst, respectively, by normalizing the sum of Pt load and Pt Electrochemical Active Surface Area (ECSA) at the working electrode. The rotating ring-disk electrode (RRDE) test was performed on PARSTAT MC electrochemical workstation (USA) with the formula:

$$n = 4 \times \frac{I_D}{I_D + \frac{I_R}{N}}$$

The electron transfer number ( $n$ ) is calculated by the formula, where  $D$  is the current disk,  $I_R$  is the ring current, and  $N$  (0.40) is the current collection efficiency of RRDE.

The actual application effect of the catalyst is reflected in the performance of single cell. Nafion 211 membrane is used for spraying. The anode is JM Pt/C catalyst, the cathode is JM Pt/C and Pt<sub>3</sub>Cu/C@PPy catalyst. The spraying area was 2×2 cm, the anode load was 0.2 mgpt cm<sup>-2</sup> and the cathode load was 0.1 mgpt cm<sup>-2</sup>. With the equipment HS330 HEPHAS ENERGY and the operating temperature of 80°C, the prepared membrane electrode assembly MEA (made of CCM, carbon paper and plastic film) is tested in H<sub>2</sub> and O<sub>2</sub> with a flow rate of 300 mL min<sup>-1</sup> after the cathode and anode are completely humidified.

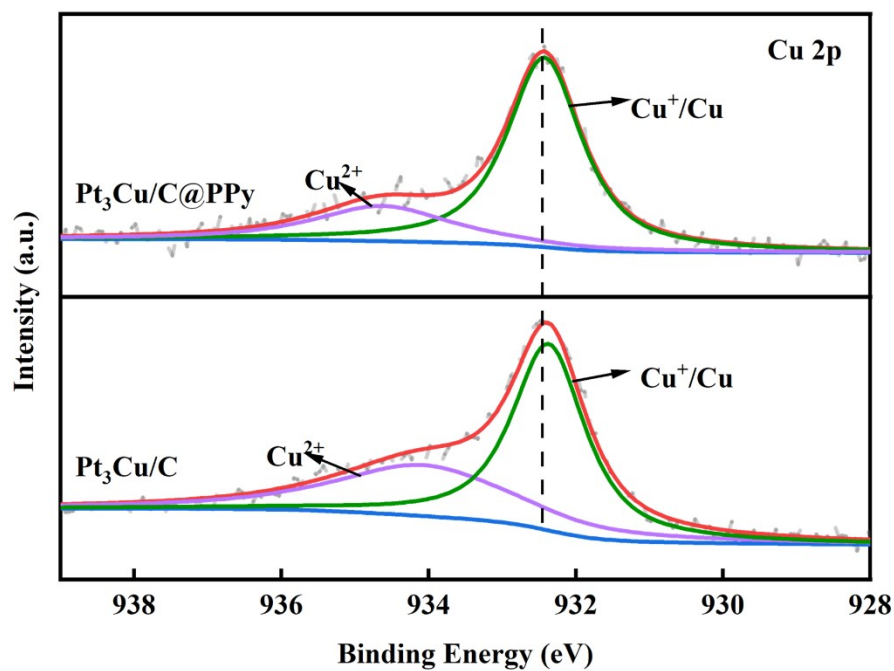

Fig. S1. Cu 2p XPS peak plot of Pt<sub>3</sub>Cu/C@PPy and Pt<sub>3</sub>Cu/C

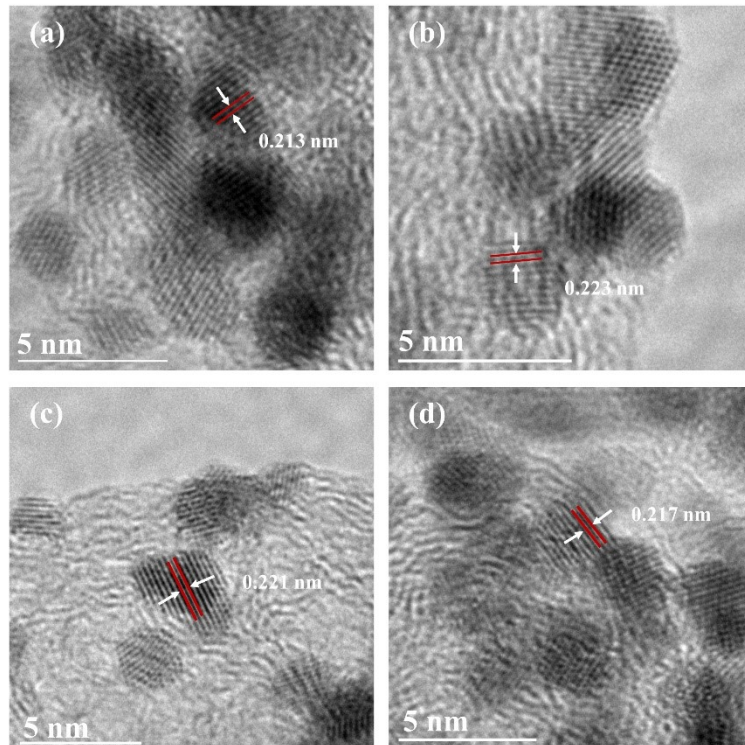

Fig. S2. HR-TEM images of (a) Pt<sub>3</sub>Cu/C@0.4-PPy, (b) Pt<sub>3</sub>Cu/C@0.2-PPy, (c) Pt<sub>3</sub>Cu/C@0.3-PPy, (d) Pt<sub>3</sub>Cu/C@0.5-PPy

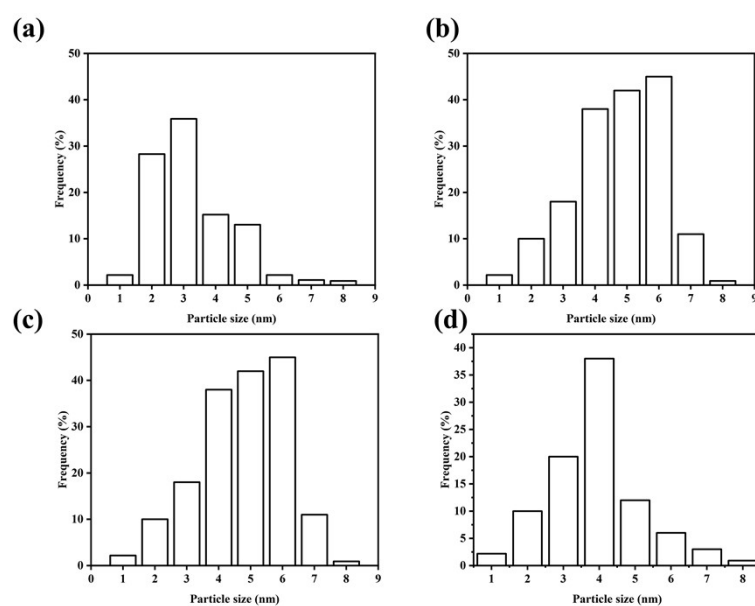

**Fig. S3. Particle-size histograms of (a) Pt<sub>3</sub>Cu/C@0.4-PPy, (b) Pt<sub>3</sub>Cu/C@0.2-PPy, (c) Pt<sub>3</sub>Cu/C@0.3-PPy, (d) Pt<sub>3</sub>Cu/C@0.5-PPy**

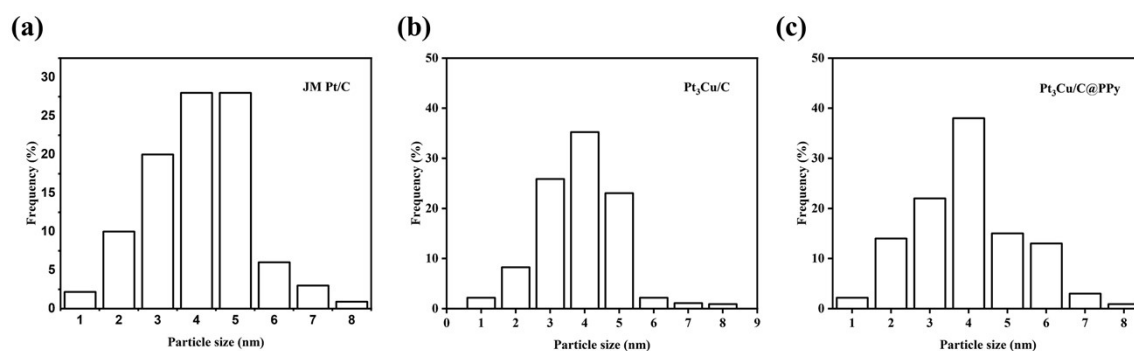

**Fig. S4. Particle-size histograms of (a) JM Pt/C, (b) Pt<sub>3</sub>Cu/C and (c) Pt<sub>3</sub>Cu/C@0.4-PPy after ADT test**
